# Supplementary material for: Intestinal Protease-Activated Receptor-2 and Fecal Serine Protease Activity are Increased in Canine Inflammatory Bowel Disease and May Contribute to Intestinal Cytokine Expression
Source: PubMed Central journal article supplement — J Vet Med Sci. 2014 May 15;76(8):1119–27. doi: 10.1292/jvms.14-0060 (PMC4155192; doi:10.1292/jvms.14-0060), 2014-05-15
Supplement: jvms-76-1119-s001.pdf [file jvms-76-1119-s001.pdf]

Table S1. Dogs with IBD included in this study

| ID    | Breed                         | Age (months) | Sex | Body weight (kg) | Type of diarrhea | Duration of diarrhea (weeks) | Vomit | Alb | CRP  | CCECAI | WSAVA total score | Diet                                  | Anti-biotics | Sampling sites (most marked inflammation) | Therapy/Response to treatment                                         |
|-------|-------------------------------|--------------|-----|------------------|------------------|------------------------------|-------|-----|------|--------|-------------------|---------------------------------------|--------------|-------------------------------------------|-----------------------------------------------------------------------|
| IBD1  | Chihuahua                     | 101          | fs  | 1.65             | Sm               | 34                           | +     | 3.7 | 3.05 | 3      | 8                 | Royal Canin Hypoallergenic            | M            | S/D (D)                                   | Prednisolone 1 mg/kg/day; Complete remission                          |
| IBD2  | Setland Sheepdog              | 58           | m   | 6.5              | Sm               | 16                           | +     | 1.7 | 0.5  | 5      | 11                | Royal Canin Hypoallergenic            | M            | S/D/I/C (S/D)                             | Prednisolone 1.5 mg/kg/day; Complete remission                        |
| IBD3  | Toy Poodle                    | 70           | f   | 3                | Sm               | 6                            | +     | 1.3 | 1.45 | 10     | 11                | Royal Canin Gastro Intestinal Low Fat | M            | S/D/I (D/I)                               | Prednisolone 2 mg/kg/day; Complete remission                          |
| IBD4  | Shiba Inu                     | 85           | fs  | 8.4              | Sm               | 15                           | -     | 1.9 | 0.55 | 6      | 15                | Hill's z/d                            | M            | S/D/C (D)                                 | Prednisolone 1.5 mg/kg/day; Partial response                          |
| IBD5  | West Highland White Terrier   | 60           | f   | 4.55             | Sm               | 25                           | +     | 3   | 0.1  | 5      | 16                | Royal Canin Hypoallergenic            | M            | S/D/I/C (D/I)                             | Prednisolone 1 mg/kg/day; No response, dead                           |
| IBD6  | Miniature Dachshund           | 160          | m   | 4.4              | Sm               | 4                            | -     | 1.3 | 0.65 | 7      | 9                 | Royal Canin Hypoallergenic            | M            | S/D/I/C (D/I)                             | Prednisolone 1.5 mg/kg/day; Complete remission                        |
| IBD7  | Shiba Inu                     | 64           | m   | 6.25             | Sm               | 16                           | -     | 3.2 | 0    | 4      | 16                | Royal Canin Hypoallergenic            | M            | S/D/I/C (D/I)                             | Prednisolone 2 mg/kg/day; Complete remission                          |
| IBD8  | Yorkshire Terrier             | 93           | fs  | 2.85             | Sm               | 8                            | -     | 2.5 | 0.55 | 6      | 15                | Royal Canin Hypoallergenic            | M            | S/D/I/C (D)                               | Prednisolone 1 mg/kg/day; Complete remission                          |
| IBD9  | Chihuahua                     | 52           | mn  | 3.6              | Sm               | 21                           | -     | 1.4 | 2.2  | 5      | 15                | Royal Canin Gastro Intestinal Low Fat | M            | S/D (D)                                   | Prednisolone 1 mg/kg/day; Complete remission                          |
| IBD10 | Jack Russell Terrier          | 67           | m   | 6.15             | Sm               | 7                            | -     | 2.7 | 1.9  | 5      | 13                | Hill's d/d potato & salmon            | M            | S/D/I/C (D)                               | Prednisolone 2 mg/kg/day; No response, dead                           |
| IBD11 | Toy Poodle                    | 59           | fs  | 4                | Sm/L             | 23                           | +     | 2.6 | 3.3  | 3      | 13                | Hill's i/d                            | M            | S/D/I/C (D/I)                             | Prednisolone 1 mg/kg/day; Complete remission                          |
| IBD12 | Pomeranian                    | 86           | f   | 3.45             | Sm               | 3                            | -     | 1.2 | 2.9  | 16     | 13                | Royal Canin Hypoallergenic            | M            | S/D/I (D/I)                               | Prednisolone 2 mg/kg/day; No response, dead                           |
| IBD13 | Pug                           | 90           | f   | 6.2              | Sm               | 12                           | -     | 1.8 | 0.4  | 8      | 14                | Royal Canin Hypoallergenic            | M            | S/D/I/C (D)                               | Prednisolone 1 mg/kg/day; Complete remission                          |
| IBD14 | Pug                           | 138          | m   | 4.6              | Sm               | 11                           | -     | 1.5 | 0.6  | 7      | 10                | Royal Canin Gastro Intestinal Low Fat | M            | S/D/I/C (D/I)                             | Prednisolone 1 mg/kg/day; Complete remission                          |
| IBD15 | Toy Poodle                    | 107          | fs  | 3.45             | Sm               | 5                            | -     | 2.6 | 0.1  | 5      | 11                | Royal Canin Hypoallergenic            | M            | S/D/I/C (D)                               | Prednisolone 1 mg/kg/day; Complete remission                          |
| IBD16 | Cairn Terrier                 | 170          | m   | 5.1              | Sm               | 9                            | -     | 2.6 | 0    | 9      | 9                 | Hill's z/d                            | M/T          | S/D/I (D)                                 | Prednisolone 1 mg/kg/day; Complete remission                          |
| IBD17 | Cavalier King Charles Spaniel | 94           | m   | 9.95             | Sm               | 16                           | -     | 3.5 | 0    | 8      | 8                 | Hill's z/d                            | M/T          | S/D/I/C (D)                               | Prednisolone 1 mg/kg/day; Complete remission                          |
| IBD18 | Setland Sheepdog              | 159          | fs  | 9.95             | Sm               | 14                           | +     | 3.1 | 3.55 | 5      | 11                | Hill's z/d                            | T            | S/D/C (D)                                 | Prednisolone 1 mg/kg/day; No response, dead                           |
| IBD19 | Yorkshire Terrier             | 96           | fs  | 2.2              | Sm/L             | 5                            | -     | 2.2 | 0    | 10     | 7                 | Royal Canin Hypoallergenic            | M            | S/D/I (D)                                 | Prednisolone 2 mg/kg/day, cyclosporine 4 mg/kg/day; No response, dead |
| IBD20 | Pembroke Welsh Corgi          | 59           | m   | 12.6             | Sm               | 32                           | -     | 3.1 | 0.1  | 8      | 8                 | Royal Canin Hypoallergenic            | M            | S/D/I/C (D)                               | Prednisolone 1 mg/kg/day; Complete remission                          |
| IBD21 | Pembroke Welsh Corgi          | 140          | fs  | 10.3             | Sm               | 4                            | +     | 1.4 | 0.7  | 6      | 13                | Hill's z/d                            | M            | S/D/I (D/I)                               | Prednisolone 1 mg/kg/day; Complete remission                          |
| IBD22 | Miniature Dachshund           | 52           | m   | 4.3              | Sm/L             | 16                           | +     | 3.3 | 0.1  | 4      | 11                | Royal Canin Hypoallergenic            | M            | S/D/I/C (D)                               | Prednisolone 1 mg/kg/day; Complete remission                          |
| IBD23 | Beagle                        | 114          | fs  | 10.75            | Sm               | 4                            | -     | 1.8 | 0    | 4      | 12                | Royal Canin Gastro Intestinal Low Fat | M            | S/D/I/C (D/I)                             | Prednisolone 1 mg/kg/day; Complete remission                          |
| IBD24 | Miniature Schnauzer           | 132          | m   | 7.1              | Sm               | 5                            | +     | 3.4 | 2.75 | 9      | 5                 | Royal Canin Hypoallergenic            | M            | S/D/I/C (D)                               | Prednisolone 1 mg/kg/day; Complete remission                          |
| IBD25 | Chihuahua                     | 87           | mn  | 3.85             | Sm               | 3                            | -     | 1.3 | 0.25 | 5      | 9                 | Hill's z/d                            | M            | S/D/I/C (D)                               | Prednisolone 1 mg/kg/day; Complete remission                          |
| IBD26 | Yorkshire Terrier             | 127          | m   | 2.3              | Sm               | 3                            | -     | 1.4 | 3.65 | 10     | 15                | Royal Canin Hypoallergenic            | M            | S/D/I/C (D)                               | Prednisolone 1 mg/kg/day; Complete remission                          |
| IBD27 | Cavalier King Charles Spaniel | 38           | m   | 6                | Sm               | 8                            | -     | 1.7 | 0.55 | 3      | 6                 | Royal Canin Hypoallergenic            | M/T          | S/D/I/C (D/I)                             | Prednisolone 1 mg/kg/day; Complete remission                          |
| IBD28 | French Bulldog                | 99           | f   | 9.5              | Sm/L             | 7                            | -     | 2   | 0    | 5      | 11                | Select protein duck & rice            | M/T          | S/D/C (D)                                 | Prednisolone 1 mg/kg/day; Partial response                            |
| IBD29 | Miniature Dachshund           | 56           | m   | 3.8              | Sm               | 5                            | -     | 3.3 | 0.55 | 4      | 7                 | Hill's z/d                            | M            | S/D/I/C (D/I)                             | Prednisolone 1 mg/kg/day; Complete remission                          |
| IBD30 | Boston Terrier                | 52           | m   | 9                | Sm               | 14                           | -     | 1.6 | 0.3  | 5      | 14                | Royal Canin Gastro Intestinal Low Fat | M            | S/D/I/C (D/I)                             | Prednisolone 1 mg/kg/day; Complete remission                          |
| IBD31 | Jack Russell Terrier          | 70           | mn  | 7.5              | Sm               | 5                            | +     | 1.8 | 0.2  | 5      | 7                 | Select protein duck & rice            | M            | S/D/I/C (D)                               | Prednisolone 1 mg/kg/day; Complete remission                          |
| IBD32 | Shiba Inu                     | 136          | m   | 8.6              | Sm               | 22                           | +     | 3   | 0.2  | 5      | 4                 | Royal Canin Hypoallergenic            | M            | S/D/I (D)                                 | Prednisolone 1 mg/kg/day; Complete remission                          |
| IBD33 | Cavalier King Charles Spaniel | 119          | fs  | 6.7              | Sm               | 25                           | +     | 1.7 | 2.25 | 4      | 12                | Hill's d/d potato & salmon            | M            | S/D/I/C (D/I)                             | Prednisolone 1 mg/kg/day; Complete remission                          |
| IBD34 | Pug                           | 81           | mn  | 9.1              | Sm               | 28                           | +     | 1.5 | 1.15 | 6      | 13                | Royal Canin Gastro Intestinal Low Fat | M            | S/D/I/C (D/I)                             | Prednisolone 1 mg/kg/day; Complete remission                          |
| IBD35 | Bichon Frise                  | 139          | f   | 6.81             | Sm               | 64                           | -     | 1.7 | 0    | 5      | 13                | Hill's d/d potato & salmon            | M            | S/D/I/C (D/I)                             | Prednisolone 1 mg/kg/day; No response, dead                           |
| IBD36 | Miniature Dachshund           | 100          | mn  | 4.55             | Sm               | 9                            | +     | 3   | 1.6  | 11     | 9                 | Hill's z/d                            | M            | S/D/I (D/I)                               | Prednisolone 1 mg/kg/day; Complete remission                          |
| IBD37 | Boston Terrier                | 71           | m   | 9.45             | Sm               | 16                           | -     | 1.5 | 3.45 | 6      | 12                | Royal Canin Hypoallergenic            | M/T          | S/D/I/C (D/I)                             | Prednisolone 1 mg/kg/day; Complete remission                          |
| IBD38 | Maltese                       | 107          | m   | 4                | Sm               | 13                           | -     | 1.9 | 0    | 8      | 11                | Hill's d/d potato & salmon            | M            | S/D/I (D)                                 | Prednisolone 1 mg/kg/day; Complete remission                          |
| IBD39 | Maltese                       | 131          | fs  | 3.4              | Sm               | 5                            | +     | 3.6 | 0.3  | 6      | 7                 | Hill's z/d                            | M            | S/D/I/C (D/I)                             | Prednisolone 1 mg/kg/day; Complete remission                          |
| IBD40 | Boston Terrier                | 75           | fs  | 4                | Sm               | 14                           | -     | 1.8 | 0.3  | 12     | 9                 | Royal Canin Hypoallergenic            | M/T          | S/D/I (D/I)                               | Prednisolone 2 mg/kg/day; No response, dead                           |

IBD, inflammatory bowel disease; m, male intact; f, female intact; mn, male neutered; fs, female spayed; Sm, small intestinal; L, large intestinal; M, metronidazole; T, tylosin; S, stomach; D, duodenum; I, ileum; C, colon; CCECAI, canine chronic enteropathy clinical activity index; WSAVA, World Small Animal Veterinary Association

Table S2. Summary of histopathologic scores based on the WSAVA standards in the duodenal mucosa of the 40 dogs with IBD

| Score        | Villous Stunting | Epithelial Injury | Crypt Distension | Lacteal Dilation | Mucosal Fibrosis | IELs | LPLs | Lamina Propria Neutrophils | Total WSAVA Score   |    |
|--------------|------------------|-------------------|------------------|------------------|------------------|------|------|----------------------------|---------------------|----|
| 0 (normal)   | 7                | 5                 | 8                | 12               | 0                | 2    | 7    | 28                         | ≤ 4 (insignificant) | 1  |
| 1 (mild)     | 26               | 12                | 18               | 16               | 1                | 16   | 14   | 9                          | 5–9 (mild)          | 14 |
| 2 (moderate) | 6                | 17                | 11               | 10               | 11               | 15   | 10   | 3                          | 10–14 (moderate)    | 19 |
| 3 (marked)   | 1                | 6                 | 3                | 2                | 28               | 7    | 9    | 0                          | 15–19 (severe)      | 6  |
|              |                  |                   |                  |                  |                  |      |      |                            | ≥20 (very severe)   | 0  |
| Total        | 40               | 40                | 40               | 40               | 40               | 40   | 40   | 40                         |                     | 40 |

IELs, intraepithelial lymphocytes; LPLs, lamina propria lymphocytes. The numbers in each cell represent the number of dogs.
